# Supplementary material for: Priming Treatments with Biostimulants to Cope the Short-Term Heat Stress Response: A Transcriptomic Profile Evaluation
Source: MDPI journal article supplement (doi:10.3390/plants11091130), 2022-04-21
Supplement: s1 [file s1]

Suppl. Table S1. Set of primers used for RNAseq validation using qPCR.

|                                                                                                     |                            |        |       |      |      |       |
|-----------------------------------------------------------------------------------------------------|----------------------------|--------|-------|------|------|-------|
| <b>at2g29500 17.6 kDa class I small heat shock protein (HSP17.6B-CI)</b>                            |                            |        |       |      |      |       |
|                                                                                                     | Template strand            | Length | Start | Stop | Tm   | GC%   |
| at2g29500 For                                                                                       | ACGAGGAGGTTTAGGTTGCC       | Plus   | 20    | 325  | 344  | 59.68 |
| at2g29500 Rev                                                                                       | ACACACCATTCTCCATCGCA       | Minus  | 20    | 394  | 375  | 59.68 |
| <b>at5g12030 AT-HSP17.6A, HSP17.6   AT-HSP17.6A (ARABIDOPSIS THALIANA HEAT SHOCK PROTEIN 17.6A)</b> |                            |        |       |      |      |       |
| at5g12030 For                                                                                       | GACATGCTTGAAGCCCCTGA       | Plus   | 20    | 46   | 65   | 60.32 |
| at5g12030 Rev                                                                                       | ATGTCCACGGCGAAAACGTA       | Minus  | 20    | 188  | 169  | 60.32 |
| <b>at5g12020 Symbols: HSP17.6II   HSP17.6II (17.6 KDA CLASS II HEAT SHOCK PROTEIN)</b>              |                            |        |       |      |      |       |
| at5g12020 For                                                                                       | AAGTCCCCGAAGACCACAAC       | Plus   | 20    | 285  | 304  | 59.89 |
| at5g12020 Rev                                                                                       | ATTGCCTTAGCGTCTCGCAT       | Minus  | 20    | 360  | 341  | 60.18 |
| <b>at1g09080 Symbols: BIP3   BIP3; ATP binding   chr1:2929217-2931841</b>                           |                            |        |       |      |      |       |
| at1g09080 For                                                                                       | TTTCTGACTGCTTTGATGTCAAGT   | Plus   | 24    | 110  | 133  | 59.12 |
| at1g09080 Rev                                                                                       | GATCCCTATCACCGTCCCCA       | Minus  | 20    | 181  | 162  | 60.47 |
| <b>at3g46230 ATHSP17.4, HSP17.4   ATHSP17.4   chr3:16984118-16984841</b>                            |                            |        |       |      |      |       |
| at3g46230 For                                                                                       | GGCGAGTATGGAGAATGGGG       | Plus   | 20    | 489  | 508  | 59.96 |
| at3g46230 Rev                                                                                       | GGACTTGACCTCCGGCTTAC       | Minus  | 20    | 561  | 542  | 60.11 |
| <b>at1g72070 DNAJ heat shock N-terminal domain-containing protein   chr1:27118621-27119708</b>      |                            |        |       |      |      |       |
| at1g72070 For                                                                                       | CCGCTTACGAGTGTGTTGATGC     | Plus   | 21    | 558  | 578  | 60.20 |
| at1g72070 Rev                                                                                       | TCCCATCCATTCTCCCACT        | Minus  | 20    | 655  | 636  | 59.95 |
| <b>at5g59720 Symbols: HSP18.2   HSP18.2 (heat shock protein 18.2)   chr5:24062577-24063277</b>      |                            |        |       |      |      |       |
| at5g59720 For                                                                                       | ATAAGTGGCACCGTGTGGAG       | Plus   | 20    | 614  | 633  | 60.04 |
| at5g59720 Rev                                                                                       | TTGAGGCTTCTTCTCAGGCG       | Minus  | 20    | 762  | 743  | 60.04 |
| <b>at5g37750 heat shock protein binding / unfolded protein binding   chr5:14995789-14997046</b>     |                            |        |       |      |      |       |
| at5g37750 For                                                                                       | ACTGTGAACATAAGAAGTACGAGTCA | Plus   | 25    | 1026 | 1050 | 59.47 |
| at5g37750 ev                                                                                        | AAAGGAGAACCCGCTCTTGT       | Minus  | 20    | 1174 | 1155 | 59.23 |

|                                                                                         |                          |       |    |      |      |       |
|-----------------------------------------------------------------------------------------|--------------------------|-------|----|------|------|-------|
| at5g37440 DNAJ heat shock N-terminal domain-containing protein   chr5:14844359-14845560 |                          |       |    |      |      |       |
| at5g37440 For                                                                           | GGCGAGGACATATGTGAGCTA    | Plus  | 21 | 1154 | 1174 | 59.39 |
| at5g37440 Rev                                                                           | ACAAGACACACTCCTACACATTGA | Minus | 24 | 1284 | 1261 | 59.90 |
| at3g14200 DNAJ heat shock N-terminal domain-containing protein   chr3:4712574-4714653   |                          |       |    |      |      |       |
| at3g14200 For                                                                           | ACAATGTTCCATCGGCTGGT     | Plus  | 20 | 966  | 985  | 59.96 |
| at3g14200 Rev                                                                           | GAAGTGGCTATGAGGTGGGG     | Minus | 20 | 1037 | 1018 | 59.82 |

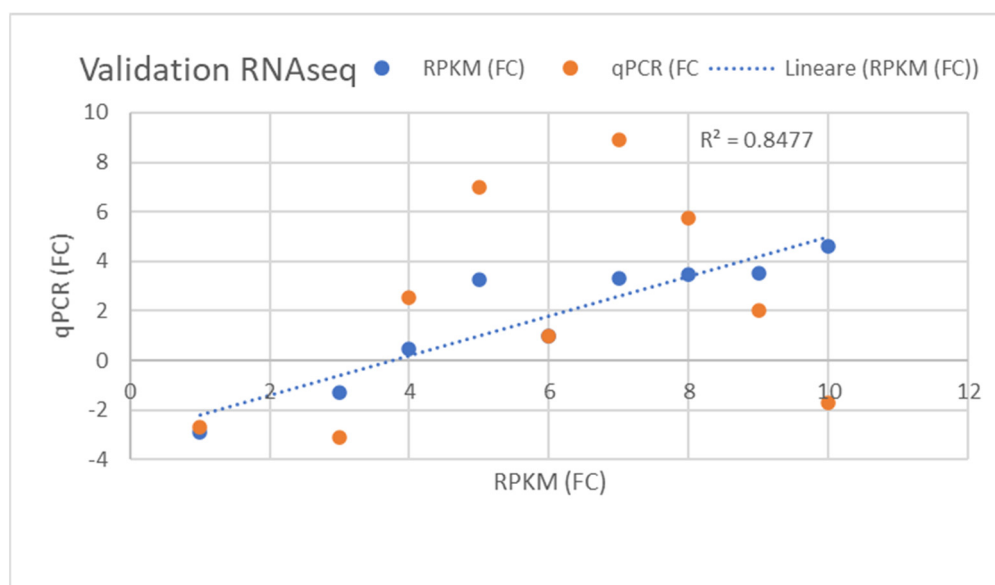

Linear regression between the RNAseq data versus qPCR data both are expressed as Log2 fold change of  $2^{-\Delta\Delta CT}$ . The correlation coefficient was  $r=0.58$ .
