# Supplementary material for: Priming Treatments with Biostimulants to Cope the Short-Term Heat Stress Response: A Transcriptomic Profile Evaluation
Source: MDPI journal article supplement (doi:10.3390/plants11091130), 2022-04-21
Supplement: s1 [file s1]

Suppl. Table S2. Terms and categories used in the DAVID analysis.

| <b>Term</b>                                                                             | <b>Meaning and links to databases</b>                                                                                                                                                                                                                                                                                                                                                                                                                                                                                     |
|-----------------------------------------------------------------------------------------|---------------------------------------------------------------------------------------------------------------------------------------------------------------------------------------------------------------------------------------------------------------------------------------------------------------------------------------------------------------------------------------------------------------------------------------------------------------------------------------------------------------------------|
| Functional Annotation Chart (FACH)                                                      | Identify enriched annotation terms associated with user's gene list                                                                                                                                                                                                                                                                                                                                                                                                                                                       |
| Functional Annotation Clustering (FAC)                                                  | Cluster functionally similar terms associated with user's gene list into groups                                                                                                                                                                                                                                                                                                                                                                                                                                           |
| Categories: database used for annotation and clustering with similar biological meaning | INTERPRO: <a href="https://www.ebi.ac.uk/interpro/">https://www.ebi.ac.uk/interpro/</a><br>GOTERM: <a href="http://geneontology.org/">http://geneontology.org/</a><br>SMART: <a href="http://smart.embl-heidelberg.de/">http://smart.embl-heidelberg.de/</a><br>UNIPROT UP_SEQ_FEATURE: <a href="https://www.uniprot.org/help/sequence_annotation">https://www.uniprot.org/help/sequence_annotation</a><br>UNIPROT UP_KEYWORDS: <a href="https://www.uniprot.org/help/keywords">https://www.uniprot.org/help/keywords</a> |
