# Supplementary material for: Priming Treatments with Biostimulants to Cope the Short-Term Heat Stress Response: A Transcriptomic Profile Evaluation
Source: MDPI journal article supplement (doi:10.3390/plants11091130), 2022-04-21
Supplement: s1 [file s1]

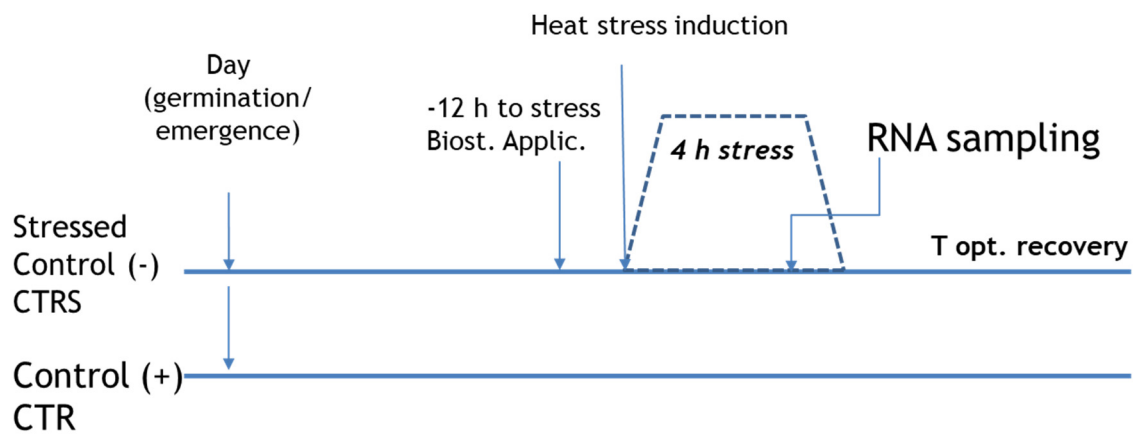

Supplementary Figure S2: Plants were grown without stress until the rosette stage. Products were applied on plants (Phylgreen and Delfan Plus) and 12 hours later heat stress started to increase rapidly until 37° C. Plants were exposed at 37° for 4 hours, then leaves were sampled for RNA extraction.
