# Supplementary material for: Priming Treatments with Biostimulants to Cope the Short-Term Heat Stress Response: A Transcriptomic Profile Evaluation
Source: Plants (Basel). 2022 Apr 21;11(9):1130. doi: 10.3390/plants11091130 (PMC9101846; doi:10.3390/plants11091130)
Supplement: Supplementary file 1 [file plants-11-01130-s001.zip]

Archive with 7 entries (7 files):
- Supplementary Dataset S1.xlsx
- Supplementary Dataset S2.xls
- Supplementary Dataset S3.xlsx
- Supplementary Figure S1.jpg
- Supplementary Figure S2.pdf
- Supplementary Table S1.pdf
- Supplementary Table S2.pdf
