# Supplementary material for: Priming Treatments with Biostimulants to Cope the Short-Term Heat Stress Response: A Transcriptomic Profile Evaluation
Source: Plants (Basel). 2022 Apr 21;11(9):1130. doi: 10.3390/plants11091130 (PMC9101846; doi:10.3390/plants11091130)
Supplement: Supplementary file 1 [file plants-11-01130-s001.zip › Supplementary Dataset S1.xlsx]

## Sheet: CTRS_vs_Phylgreen
Metabolic and function	id	description	Log FC>2
cell wall.hemicellulose synthesis	at3g42180	catalytic/ transferase, transferring glycosyl groups | chr3:14324274-14328676 REVERSE	2.37
hormone metabolism.ethylene.signal transduction	at3g23230	ethylene-responsive factor, putative | chr3:8289647-8290066 REVERSE	3.91
stress.biotic.PR-proteins.plant defensins	at2g26020	Symbols: PDF1.2b | PDF1.2b (plant defensin 1.2b) | chr2:11089250-11089597 FORWARD	3.77
stress.biotic.PR-proteins.plant defensins	at5g44430	Symbols: PDF1.2c | PDF1.2c (plant defensin 1.2c) | chr5:17908945-17909507 REVERSE	2.5
misc.cytochrome P450	at1g50560	Symbols: CYP705A25 | CYP705A25; electron carrier/ heme binding / iron ion binding / monooxygenase/ oxygen binding | chr1:18724207-18726272 FORWARD	4.25
RNA.regulation of transcription.AP2/EREBP, APETALA2/Ethylene-responsive element binding protein family	at5g65130	AP2 domain-containing transcription factor, putative | chr5:26017403-26018236 FORWARD	3.75
RNA.regulation of transcription.C2H2 zinc finger family	at1g67030	Symbols: ZFP6 | ZFP6 (ZINC FINGER PROTEIN 6); nucleic acid binding / transcription factor/ zinc ion binding | chr1:25016543-25017512 FORWARD	3.95
RNA.regulation of transcription.WRKY domain transcription factor family	at5g28650	Symbols: WRKY74, ATWRKY74 | WRKY74; calmodulin binding / transcription factor | chr5:10677716-10679204 REVERSE	2.06
RNA.regulation of transcription.unclassified	at3g51325	zinc finger (C3HC4-type RING finger) family protein | chr3:19051991-19052694 FORWARD	3.25
protein.degradation.ubiquitin.E3.SCF.FBOX	at3g43710	kelch repeat-containing F-box family protein | chr3:15605608-15606744 FORWARD	2.29
not assigned.no ontology	at3g61028	unknown protein | chr3:22582750-22584880 REVERSE	2.04
not assigned.unknown	at1g10155	Symbols: ATPP2-A10 | ATPP2-A10 (PHLOEM PROTEIN 2-A10) | chr1:3327637-3328448 REVERSE	2.52
not assigned.unknown	at3g46880	unknown protein | chr3:17265293-17266266 FORWARD	2.58
not assigned.unknown	at3g60890	Symbols: ZPR2 | ZPR2 (LITTLE ZIPPER 2); protein binding | chr3:22497024-22497475 REVERSE	3.78
not assigned.unknown	at5g57887	unknown protein | chr5:23446721-23447249 FORWARD	2.86

## Sheet: CTRS_vs_Delfan_Plus
id	Metabolism and function	description	Log FC>2
at5g66690	secondary metabolism.phenylpropanoids.lignin biosynthesis	Symbols: UGT72E2 | UGT72E2; UDP-glycosyltransferase/ coniferyl-alcohol glucosyltransferase/ transferase, transferring glycosyl groups | chr5:26625080-26626793 FORWARD	4.86
at4g22070	RNA.regulation of transcription.WRKY domain transcription factor family	Symbols: WRKY31, ATWRKY31 | WRKY31; transcription factor | chr4:11691378-11694392 REVERSE	4.39
at5g19880	misc.peroxidases	peroxidase, putative | chr5:6720384-6722475 REVERSE	4.35
at1g13520	not assigned.unknown	unknown protein | chr1:4631778-4633248 REVERSE	3.94
at5g06730	misc.peroxidases	peroxidase, putative | chr5:2079955-2081684 REVERSE	3.73
at5g39130	stress.abiotic.unspecified	germin-like protein, putative | chr5:15665502-15666444 REVERSE	3.7
at1g14930	stress.abiotic.unspecified	major latex protein-related / MLP-related | chr1:5152263-5153084 REVERSE	3.58
at5g67110	RNA.regulation of transcription.bHLH,Basic Helix-Loop-Helix family	Symbols: ALC | ALC (ALCATRAZ); DNA binding / transcription factor | chr5:26785106-26786383 REVERSE	3.46
at2g15780	not assigned.no ontology.glycine rich proteins	glycine-rich protein | chr2:6873545-6874741 REVERSE	3.46
at4g09300	not assigned.unknown	FUNCTIONS IN: molecular_function unknown; INVOLVED IN: biological_process unknown; LOCATED IN: cellular_component unknown; EXPRESSED IN: flower; EXPRESSED DURING: petal differentiation and expansion stage; CONTAINS InterPro DOMAIN/s: LisH dimerisation motif, subgroup (InterPro:IPR013720), CTLH, C-terminal to LisH motif (InterPro:IPR006595), LisH dimerisation motif (InterPro:IPR006594), CT11-RanBP…	3.39
at1g19250	misc.oxidases - copper, flavone etc	Symbols: FMO1 | FMO1 (FLAVIN-DEPENDENT MONOOXYGENASE 1); FAD binding / NADP or NADPH binding / electron carrier/ flavin-containing monooxygenase/ monooxygenase/ oxidoreductase | chr1:6650529-6653078 REVERSE	3.36
at3g46500	hormone metabolism.gibberelin.synthesis-degradation	oxidoreductase, 2OG-Fe(II) oxygenase family protein | chr3:17120480-17122745 FORWARD	3.32
at2g42060	RNA.regulation of transcription.unclassified	CHP-rich zinc finger protein, putative | chr2:17548095-17549069 FORWARD	3.32
atmg00280	not assigned.unknown	Symbols: ORF110A | hypothetical protein | chrM:77819-78151 REVERSE	3.32
at5g07330	not assigned.unknown	unknown protein | chr5:2315980-2316874 FORWARD	3.25
at4g15380	misc.cytochrome P450	Symbols: CYP705A4 | CYP705A4; electron carrier/ heme binding / iron ion binding / monooxygenase/ oxygen binding | chr4:8788739-8790444 FORWARD	3
at1g10220	not assigned.unknown	FUNCTIONS IN: molecular_function unknown; INVOLVED IN: biological_process unknown; BEST Arabidopsis thaliana protein match is: ZCF37 (TAIR:AT1G59590.1); Has 30 Blast hits to 30 proteins in 10 species: Archae - 0; Bacteria - 2; Metazoa - 6; Fungi - 0; Plants - 15; Viruses - 0; Other Eukaryotes - 7 (source: NCBI BLink). | chr1:3352159-3354690 FORWARD	2.81
at3g57100	not assigned.unknown	unknown protein | chr3:21133013-21134482 REVERSE	2.81
at5g14070	redox.glutaredoxins	Symbols: ROXY2 | ROXY2; electron carrier/ protein disulfide oxidoreductase | chr5:4541836-4542514 FORWARD	2.74
at2g21930	protein.degradation.ubiquitin.E3.SCF.FBOX	F-box family protein | chr2:9347641-9349128 REVERSE	2.74
at3g21520	not assigned.unknown	unknown protein | chr3:7581959-7582793 FORWARD	2.66
at3g01202	micro RNA, natural antisense etc	other RNA | chr3:69854-71415 FORWARD	2.58
at2g04050	transport.misc	MATE efflux family protein | chr2:1337386-1339270 REVERSE	2.58
at5g18350	stress.biotic.PR-proteins	ATP binding / nucleoside-triphosphatase/ nucleotide binding / protein binding / transmembrane receptor | chr5:6074069-6078569 REVERSE	2.5
at5g41730	not assigned.unknown	protein kinase family protein | chr5:16684914-16687145 REVERSE	2.46
at1g26390	misc.nitrilases, *nitrile lyases, berberine bridge enzymes, reticuline oxidases, troponine reductases	FAD-binding domain-containing protein | chr1:9130017-9131779 REVERSE	2.42
at5g15130	RNA.regulation of transcription.WRKY domain transcription factor family	Symbols: WRKY72, ATWRKY72 | WRKY72; transcription factor | chr5:4904347-4907094 FORWARD	2.42
at2g36750	hormone metabolism.cytokinin.synthesis-degradation	Symbols: UGT73C1 | UGT73C1 (UDP-GLUCOSYL TRANSFERASE 73C1); UDP-glucosyltransferase/ UDP-glycosyltransferase/ cis-zeatin O-beta-D-glucosyltransferase/ trans-zeatin O-beta-D-glucosyltransferase/ transferase, transferring glycosyl groups | chr2:15410462-15412038 REVERSE	2.22
at5g61412	not assigned.unknown	unknown protein | chr5:24686755-24687042 REVERSE	2.17
at1g71000	stress.abiotic.heat	heat shock protein binding | chr1:26769336-26770111 REVERSE	2.14
at2g33080	stress.biotic	Symbols: AtRLP28 | AtRLP28 (Receptor Like Protein 28); protein binding | chr2:14032015-14034237 FORWARD	2.01
at5g15660	protein.degradation.ubiquitin.E3.SCF.FBOX	F-box family protein | chr5:5095652-5097041 FORWARD	2
at4g32445	micro RNA, natural antisense etc	Symbols: MIR419 | MIR419; miRNA | chr4:15660370-15660475 FORWARD	2
