# Supplementary material for: Priming Treatments with Biostimulants to Cope the Short-Term Heat Stress Response: A Transcriptomic Profile Evaluation
Source: Plants (Basel). 2022 Apr 21;11(9):1130. doi: 10.3390/plants11091130 (PMC9101846; doi:10.3390/plants11091130)
Supplement: Supplementary file 1 [file plants-11-01130-s001.zip › Supplementary Dataset S2.xls]

## Sheet: Transcriptional
Accession n.	description CTRS	Up-regulated		Accession n.	description-Phylgreen	Up-Regulated		Accession n.	description - Delfan plus	Up-Regulated (Fold Change)
at2g38250	DNA-binding protein-related | chr2:16018357-16019500 FORWARD	4.671		at2g22760	basic helix-loop-helix (bHLH) family protein | chr2:9677880-9679364 FORWARD	9.18		at4g29030	glycine-rich protein | chr4:14307249-14307973 FORWARD	5.409
at5g66700	HB53, HB-8, ATHB53 | HB53; DNA binding / transcription factor | chr5:26634320-26635885 FORWARD	4.459		at1g12610	Symbols: DDF1 | DDF1 (DWARF AND DELAYED FLOWERING 1); DNA binding / sequence-specific DNA binding / transcription factor | chr1:4289944-4291017 REVERSE	7.73		at2g21900	Symbols: WRKY59, ATWRKY59 | WRKY59; transcription factor | chr2:9334149-9336222 REVERSE	4.807
at3g55980	SZF1, ATSZF1 | SZF1 (SALT-INDUCIBLE ZINC FINGER 1); transcription factor | chr3:20776295-20778842 FORWARD	4.191		at3g23250	Symbols: MYB15, ATY19, ATMYB15 | MYB15 (MYB DOMAIN PROTEIN 15); DNA binding / transcription factor | chr3:8309209-8310826 FORWARD	5.745		at3g55150	Symbols: ATEXO70H1 | ATEXO70H1 (exocyst subunit EXO70 family protein H1); protein binding | chr3:20440550-20442604 REVERSE	4.7
at4g11920	CCS52A2, FZR1 | CCS52A2; signal transducer | chr4:7160276-7163382 REVERSE	4.057		at5g43650	basic helix-loop-helix (bHLH) family protein | chr5:17533193-17534796 REVERSE	5.581		at5g54230	Symbols: MYB49, AtMYB49 | MYB49 (myb domain protein 49); transcription factor | chr5:22016250-22017933 REVERSE	4.524
at1g66560	WRKY64, ATWRKY64 | WRKY64; transcription factor | chr1:24833579-24834631 FORWARD	3.907		at5g51990	Symbols: CBF4, DREB1D | CBF4 (C- REPEAT-BINDING FACTOR 4); DNA binding / transcription activator/ transcription factor | chr5:21117113-21117787 REVERSE	4.866		at1g71520	AP2 domain-containing transcription factor, putative | chr1:26938525-26939106 FORWARD	4.066
at1g18330	EPR1 | EPR1 (EARLY-PHYTOCHROME-RESPONSIVE1); DNA binding / transcription factor | chr1:6305971-6308010 REVERSE	3.755		at5g21960	AP2 domain-containing transcription factor, putative | chr5:7258363-7259308 REVERSE	4.582		at3g56980	Symbols: BHLH039, ORG3 | BHLH039; DNA binding / transcription factor | chr3:21086546-21087494 REVERSE	3.382
at4g38910	BPC5, BBR/BPC5, ATBPC5 | BPC5 (BASIC PENTACYSTEINE 5); DNA binding / transcription factor | chr4:18145239-18146928 REVERSE	3.585		at2g22770	Symbols: NAI1 | NAI1; DNA binding / transcription factor | chr2:9684725-9686595 FORWARD	4.576		at3g27650	Symbols: LBD25 | LBD25 (LOB DOMAIN-CONTAINING PROTEIN 25) | chr3:10238546-10240611 FORWARD	3.365
at4g11060	MTSSB | MTSSB (mitochondrially targeted single-stranded DNA binding protein); single-stranded DNA binding | chr4:6754587-6756532 REVERSE	3.459		at4g31800	Symbols: WRKY18, ATWRKY18 | WRKY18; transcription factor | chr4:15383201-15385029 FORWARD	4.561		at1g10585	transcription factor | chr1:3493940-3495144 REVERSE	3.242
at5g45980	WOX8, STPL | WOX8 (WUSCHEL RELATED HOMEOBOX 8); DNA binding / transcription factor | chr5:18648909-18650836 FORWARD	3.346		at2g35930	Symbols: PUB23 | PUB23 (PLANT U-BOX 23); ubiquitin-protein ligase | chr2:15082855-15084473 REVERSE	4.288		at1g01530	Symbols: AGL28 | AGL28 (AGAMOUS-LIKE 28); DNA binding / transcription factor | chr1:192640-193670 REVERSE	3.17
at5g06100	MYB33, ATMYB33 | MYB33 (MYB DOMAIN PROTEIN 33); DNA binding / transcription factor | chr5:1837914-1840727 FORWARD	3.209		at5g14510	armadillo/beta-catenin repeat family protein | chr5:4677973-4679194 REVERSE	4.285		at5g52600	Symbols: AtMYB82 | AtMYB82 (myb domain protein 82); DNA binding / transcription factor | chr5:21343102-21343968 REVERSE	3.087
at5g57520	ZFP2, ATZFP2 | ZFP2 (ZINC FINGER PROTEIN 2); nucleic acid binding / transcription factor/ zinc ion binding | chr5:23295964-23296683 FORWARD	3.202		at5g52020	AP2 domain-containing protein | chr5:21123958-21124948 REVERSE	4.17		at4g12350	Symbols: MYB42, AtMYB42 | MYB42 (myb domain protein 42); transcription factor | chr4:7324912-7326636 FORWARD	3
at5g38140	NF-YC12 | NF-YC12 (NUCLEAR FACTOR Y, SUBUNIT C12); DNA binding / transcription factor | chr5:15220208-15222272 REVERSE	3.031		at4g00670	DNA binding | chr4:278316-279186 REVERSE	4.17		at1g67370	Symbols: ASY1, ATASY1 | ASY1 (ASYNAPTIC 1); DNA binding | chr1:25239117-25243837 REVERSE	3
at2g44020	mitochondrial transcription termination factor-related / mTERF-related | chr2:18217559-18219385 REVERSE	3		at5g49520	Symbols: WRKY48, ATWRKY48 | WRKY48; transcription factor | chr5:20090776-20093346 FORWARD	4.146		at1g43160	Symbols: RAP2.6 | RAP2.6 (related to AP2 6); DNA binding / transcription factor | chr1:16263813-16264818 FORWARD	2.905
at1g42990	ATBZIP60, BZIP60 | ATBZIP60 (BASIC REGION/LEUCINE ZIPPER MOTIF 60); DNA binding / transcription factor | chr1:16135852-16137463 REVERSE	2.945		at1g19210	AP2 domain-containing transcription factor, putative | chr1:6626822-6627530 REVERSE	4.022		at2g41240	Symbols: BHLH100 | BHLH100 (BASIC HELIX-LOOP-HELIX PROTEIN 100); DNA binding / transcription factor | chr2:17198331-17199320 REVERSE	2.839
at5g13240	transcription regulator | chr5:4225005-4227613 REVERSE	2.874		at5g52170	Symbols: HDG7 | HDG7 (HOMEODOMAIN GLABROUS 7); DNA binding / sequence-specific DNA binding / transcription factor | chr5:21196974-21199959 FORWARD	4		at4g09820	Symbols: TT8 | TT8 (TRANSPARENT TESTA 8); DNA binding / transcription factor | chr4:6182023-6186493 FORWARD	2.807
at1g10586	transcription regulator | chr1:3496928-3499439 REVERSE	2.856		at1g09950	transcription factor-related | chr1:3240606-3241632 REVERSE	3.937		at5g59570	myb family transcription factor | chr5:24003888-24005512 FORWARD	2.807
at5g26650	AGL36 | AGL36 (AGAMOUS-LIKE 36); DNA binding / transcription factor | chr5:9343785-9345011 FORWARD	2.7		at1g77640	AP2 domain-containing transcription factor, putative | chr1:29178737-29179675 FORWARD	3.824		at5g56960	basic helix-loop-helix (bHLH) family protein | chr5:23038703-23041174 REVERSE	2.722
at5g61420	MYB28, HAG1 | MYB28 (myb domain protein 28); DNA binding / transcription factor | chr5:24689151-24690797 REVERSE	2.7		at4g23810	Symbols: WRKY53, ATWRKY53 | WRKY53; DNA binding / protein binding / transcription activator/ transcription factor | chr4:12392370-12393982 REVERSE	3.721		at5g64750	Symbols: ABR1 | ABR1 (ABA REPRESSOR1); DNA binding / transcription factor | chr5:25891506-25893888 FORWARD	2.71
at2g45050	zinc finger (GATA type) family protein | chr2:18582872-18584083 FORWARD	2.663		at4g29930	basic helix-loop-helix (bHLH) family protein | chr4:14644009-14645505 FORWARD	3.688		at3g06220	DNA binding / transcription factor | chr3:1883616-1884953 REVERSE	2.7
at5g59730	ATEXO70H7 | ATEXO70H7 (EXOCYST SUBUNIT EXO70 FAMILY PROTEIN H7); protein binding | chr5:24063877-24066170 REVERSE	2.653		at5g43290	Symbols: WRKY49, ATWRKY49 | WRKY49; transcription factor | chr5:17371838-17373201 REVERSE	3.658		at1g10586	transcription regulator | chr1:3496928-3499439 REVERSE	2.585
at1g12860	SCRM2, ICE2 | SCRM2 (SCREAM 2); DNA binding / transcription factor | chr1:4382223-4386392 FORWARD	2.585		at3g53600	zinc finger (C2H2 type) family protein | chr3:19875532-19876059 FORWARD	3.619		at4g33880	basic helix-loop-helix (bHLH) family protein | chr4:16239363-16241137 REVERSE	2.585
at1g66470	basic helix-loop-helix (bHLH) family protein | chr1:24795214-24796988 FORWARD	2.585		at1g80840	Symbols: WRKY40, ATWRKY40 | WRKY40; transcription factor | chr1:30383691-30385499 FORWARD	3.617		at1g68120	Symbols: BPC3, ATBPC3 | BPC3 (BASIC PENTACYSTEINE 3); DNA binding / transcription factor | chr1:25526215-25527534 REVERSE	2.485
at5g62320	MYB99, ATMYBCU15, ATMYB99 | ATMYB99 (MYB DOMAIN PROTEIN 99); DNA binding / transcription factor | chr5:25028716-25029933 REVERSE	2.585		at3g06220	DNA binding / transcription factor | chr3:1883616-1884953 REVERSE	3.585		at2g33710	AP2 domain-containing transcription factor family protein | chr2:14258509-14260733 REVERSE	2.415
at4g31620	transcriptional factor B3 family protein | chr4:15322452-15324681 REVERSE	2.585		at1g33760	AP2 domain-containing transcription factor, putative | chr1:12237878-12238598 FORWARD	3.563		at2g33720	transcription factor | chr2:14263732-14265202 FORWARD	2.322
at2g47850	zinc finger (CCCH-type) family protein | chr2:19595673-19598581 FORWARD	2.503		at1g74430	Symbols: MYB95, ATMYB95, ATMYBCP66 | MYB95 (myb domain protein 95); DNA binding / transcription factor | chr1:27975179-27977434 FORWARD	3.518		at5g35550	Symbols: TT2, ATMYB123, MYB123, ATTT2 | TT2 (TRANSPARENT TESTA 2); DNA binding / transcription factor | chr5:13726743-13727860 FORWARD	2.322
at1g80740	CMT1, DMT4 | CMT1 (CHROMOMETHYLASE 1); DNA binding / chromatin binding | chr1:30342394-30347048 FORWARD	2.459		at4g01250	Symbols: WRKY22, AtWRKY22 | WRKY22; transcription factor | chr4:522604-524216 REVERSE	3.324		at2g24700	transcriptional factor B3 family protein | chr2:10513016-10515411 REVERSE	2.322
at4g39680	SAP domain-containing protein | chr4:18414306-18417530 REVERSE	2.445		at5g41315	Symbols: GL3, MYC6.2 | GL3 (GLABROUS 3); protein binding / transcription factor | chr5:16529455-16532879 FORWARD	3.322		at3g01600	Symbols: anac044 | anac044 (Arabidopsis NAC domain containing protein 44); transcription factor | chr3:229171-231105 FORWARD	2.273
at5g05610	Symbols: AL1 | AL1 (ALFIN-LIKE 1); DNA binding / methylated histone residue binding | chr5:1676991-1679104 REVERSE	2.435		at1g23380	Symbols: KNAT6, KNAT6L, KNAT6S | KNAT6; DNA binding / transcription activator/ transcription factor | chr1:8297291-8302600 REVERSE	3.322		at1g67260	Symbols: TCP1 | TCP1; DNA binding / transcription factor | chr1:25168228-25169307 REVERSE	2.258
at2g34820	basic helix-loop-helix (bHLH) family protein | chr2:14689624-14690879 FORWARD	2.357		at5g64750	Symbols: ABR1 | ABR1 (ABA REPRESSOR1); DNA binding / transcription factor | chr5:25891506-25893888 FORWARD	3.179		at2g26940	zinc finger (C2H2 type) family protein | chr2:11496518-11497378 REVERSE	2.17
at3g26744	Symbols: ICE1, ATICE1, SCRM | ICE1 (INDUCER OF CBF EXPRESSION 1); DNA binding / transcription activator/ transcription factor | chr3:9832689-9835087 REVERSE	2.322		at5g51790	basix helix-loop-helix (bHLH) family protein | chr5:21039762-21040594 FORWARD	3.093		at1g68320	Symbols: MYB62, AtMYB62, BW62B, BW62C | MYB62 (myb domain protein 62); DNA binding / transcription factor | chr1:25603842-25605096 FORWARD	2.17
at5g41020	myb family transcription factor | chr5:16425883-16427797 REVERSE	2.322		at1g52830	Symbols: IAA6, SHY1 | IAA6 (INDOLE-3-ACETIC ACID 6); transcription factor | chr1:19672496-19673644 REVERSE	3.063		at4g31620	transcriptional factor B3 family protein | chr4:15322452-15324681 REVERSE	2.17
at1g07360	zinc finger (CCCH-type) family protein / RNA recognition motif (RRM)-containing protein | chr1:2260389-2262865 REVERSE	2.166		at3g10815	zinc finger (C3HC4-type RING finger) family protein | chr3:3384807-3386327 REVERSE	3.011		at4g04450	Symbols: WRKY42, AtWRKY42 | WRKY42; transcription factor | chr4:2218379-2221114 FORWARD	2.147
at5g10140	Symbols: FLC, FLF, AGL25 | FLC (FLOWERING LOCUS C); specific transcriptional repressor/ transcription factor | chr5:3173497-3179448 REVERSE	2.115		at1g63910	Symbols: AtMYB103 | AtMYB103 (myb domain protein 103); DNA binding / transcription activator/ transcription factor | chr1:23719783-23721774 REVERSE	3		at3g56970	Symbols: BHLH038, ORG2 | BHLH038; DNA binding / transcription factor | chr3:21084110-21085150 REVERSE	2.136
at1g45207	remorin family protein | chr1:17130351-17133548 REVERSE	2.106		at4g31615	DNA binding / transcription factor | chr4:15320297-15322194 REVERSE	3		at4g16610	zinc finger (C2H2 type) family protein | chr4:9354321-9355287 REVERSE	2.087
at2g38880	Symbols: NF-YB1 | NF-YB1 (NUCLEAR FACTOR Y, SUBUNIT B1); transcription factor | chr2:16238492-16240476 FORWARD	2.1		at5g50915	basic helix-loop-helix (bHLH) family protein | chr5:20710209-20712315 REVERSE	2.939		at4g31805	WRKY family transcription factor | chr4:15385280-15386982 FORWARD	2.062
at1g74430	Symbols: MYB95, ATMYB95, ATMYBCP66 | MYB95 (myb domain protein 95); DNA binding / transcription factor | chr1:27975179-27977434 FORWARD	2.095		at5g62320	Symbols: MYB99, ATMYBCU15, ATMYB99 | ATMYB99 (MYB DOMAIN PROTEIN 99); DNA binding / transcription factor | chr5:25028716-25029933 REVERSE	2.907		at1g29160	Dof-type zinc finger domain-containing protein | chr1:10183797-10184324 REVERSE	2.051
at4g38000	Dof-type zinc finger domain-containing protein | chr4:17858351-17859325 FORWARD	2.088		at1g68640	Symbols: PAN | PAN (PERIANTHIA); DNA binding / transcription factor | chr1:25769576-25772543 REVERSE	2.907		at5g13330	Symbols: Rap2.6L | Rap2.6L (related to AP2 6L); DNA binding / transcription factor | chr5:4272060-4274660 FORWARD	2.011
at5g06510	Symbols: NF-YA10 | NF-YA10 (NUCLEAR FACTOR Y, SUBUNIT A10); transcription factor | chr5:1984991-1987044 FORWARD	2		at4g34400	DNA binding / transcription factor | chr4:16445208-16447773 FORWARD	2.837		at3g10113	myb family transcription factor | chr3:3118043-3119391 REVERSE	2
at2g26950	Symbols: AtMYB104 | AtMYB104 (myb domain protein 104); DNA binding / transcription factor | chr2:11500721-11502136 REVERSE	2		at1g72210	basic helix-loop-helix (bHLH) family protein (bHLH096) | chr1:27179790-27182430 FORWARD	2.811		at5g66870	Symbols: ASL1, LBD36 | ASL1 | chr5:26705862-26708676 FORWARD	2
at3g10595	myb family transcription factor | chr3:3311785-3312831 REVERSE	2		at3g10590	myb family transcription factor | chr3:3310424-3311311 REVERSE	2.807		Accession n.	description - Delfan plus	Down-Regulated (Fold Change)
at3g09230	Symbols: AtMYB1 | AtMYB1 (myb domain protein 1); DNA binding / transcription factor | chr3:2833398-2835338 FORWARD	2		at5g59820	Symbols: RHL41, ZAT12 | RHL41 (RESPONSIVE TO HIGH LIGHT 41); nucleic acid binding / transcription factor/ zinc ion binding | chr5:24102972-24103787 FORWARD	2.781		at2g22760	basic helix-loop-helix (bHLH) family protein | chr2:9677880-9679364 FORWARD	-2
at1g26760	Symbols: ATXR1, SDG35 | SDG35 (SET DOMAIN PROTEIN 35); binding | chr1:9248152-9249943 REVERSE	2		at1g66160	Symbols: ATCMPG1, CMPG1 | U-box domain-containing protein | chr1:24637196-24638608 FORWARD	2.759		at1g65330	Symbols: PHE1, AGL37 | PHE1 (PHERES1); DNA binding / transcription factor | chr1:24266481-24267320 REVERSE	-2
Accession n.	description CTRS	Down-regulated		at5g61280	remorin family protein | chr5:24643625-24644910 REVERSE	2.755		at2g35930	Symbols: PUB23 | PUB23 (PLANT U-BOX 23); ubiquitin-protein ligase | chr2:15082855-15084473 REVERSE	-2.007
at4g25490	Symbols: CBF1, DREB1B, ATCBF1 | CBF1 (C-REPEAT/DRE BINDING FACTOR 1); DNA binding / transcription activator/ transcription factor | chr4:13021780-13022725 REVERSE	-5.392		at1g27730	Symbols: STZ, ZAT10 | STZ (salt tolerance zinc finger); nucleic acid binding / transcription factor/ transcription repressor/ zinc ion binding | chr1:9648141-9649073 REVERSE	2.749		at1g21910	AP2 domain-containing transcription factor family protein | chr1:7696536-7697699 FORWARD	-2.065
at1g64000	Symbols: WRKY56, ATWRKY56 | WRKY56; transcription factor | chr1:23747304-23749053 FORWARD	-4		at2g38250	DNA-binding protein-related | chr2:16018357-16019500 FORWARD	2.716		at5g65080	Symbols: MAF5, AGL68 | MAF5 (MADS AFFECTING FLOWERING 5); transcription factor | chr5:25997504-26002465 FORWARD	-2.07
at1g72010	TCP family transcription factor, putative | chr1:27107567-27109275 FORWARD	-3.322		at2g26940	zinc finger (C2H2 type) family protein | chr2:11496518-11497378 REVERSE	2.7		at1g80840	Symbols: WRKY40, ATWRKY40 | WRKY40; transcription factor | chr1:30383691-30385499 FORWARD	-2.071
at3g56980	Symbols: BHLH039, ORG3 | BHLH039; DNA binding / transcription factor | chr3:21086546-21087494 REVERSE	-3.036		at5g03720	Symbols: AT-HSFA3, HSFA3 | AT-HSFA3; DNA binding / transcription factor | chr5:971786-973683 REVERSE	2.675		at1g51700	Symbols: ADOF1 | ADOF1; DNA binding / transcription factor | chr1:19174070-19175189 FORWARD	-2.074
at5g42325	transcription elongation factor-related | chr5:16924102-16924851 REVERSE	-3		at3g07650	Symbols: COL9 | COL9 (CONSTANS-LIKE 9); transcription factor/ zinc ion binding | chr3:2441657-2444532 FORWARD	2.649		at3g19580	Symbols: AZF2 | AZF2 (ARABIDOPSIS ZINC-FINGER PROTEIN 2); DNA binding / nucleic acid binding / transcription factor/ transcription repressor/ zinc ion binding | chr3:6803166-6804233 REVERSE	-2.119
at4g04840	Symbols: ATMSRB6 | methionine sulfoxide reductase domain-containing protein / SeIR domain-containing protein | chr4:2449560-2451589 FORWARD	-2.737		at1g21910	AP2 domain-containing transcription factor family protein | chr1:7696536-7697699 FORWARD	2.627		at3g23250	Symbols: MYB15, ATY19, ATMYB15 | MYB15 (MYB DOMAIN PROTEIN 15); DNA binding / transcription factor | chr3:8309209-8310826 FORWARD	-2.149
at3g62100	Symbols: IAA30 | IAA30 (INDOLE-3-ACETIC ACID INDUCIBLE 30); transcription factor | chr3:22995791-22996761 FORWARD	-2.7		at5g49450	Symbols: AtbZIP1 | AtbZIP1 (Arabidopsis thaliana basic leucine-zipper 1); DNA binding / protein heterodimerization/ transcription factor | chr5:20051829-20052735 FORWARD	2.583		at1g21340	Dof-type zinc finger domain-containing protein | chr1:7476087-7476869 FORWARD	-2.17
at1g10170	Symbols: ATNFXL1 | ATNFXL1 (ARABIDOPSIS THALIANA NF-X-LIKE 1); protein binding / transcription factor/ zinc ion binding | chr1:3333595-3337491 REVERSE	-2.7		at4g09820	Symbols: TT8 | TT8 (TRANSPARENT TESTA 8); DNA binding / transcription factor | chr4:6182023-6186493 FORWARD	2.536		at3g50060	Symbols: MYB77 | MYB77; DNA binding / transcription factor | chr3:18557970-18559106 REVERSE	-2.215
at5g52260	Symbols: AtMYB19 | AtMYB19 (myb domain protein 19); DNA binding / transcription factor | chr5:21220165-21221288 FORWARD	-2.684		at5g59570	myb family transcription factor | chr5:24003888-24005512 FORWARD	2.517		at4g38340	RWP-RK domain-containing protein | chr4:17954710-17957828 FORWARD	-2.289
at2g33720	transcription factor | chr2:14263732-14265202 FORWARD	-2.585		at3g27860	PWWP domain-containing protein | chr3:10326128-10328086 FORWARD	2.508		at5g56200	zinc finger (C2H2 type) family protein | chr5:22747768-22749249 FORWARD	-2.322
at3g22220	hAT dimerisation domain-containing protein | chr3:7839616-7842874 REVERSE	-2.585		at2g37260	Symbols: TTG2, ATWRKY44, WRKY44, DSL1 | TTG2 (TRANSPARENT TESTA GLABRA 2); transcription factor | chr2:15644840-15647065 FORWARD	2.494		at1g01150	DNA binding / protein binding / zinc ion binding | chr1:70115-72138 REVERSE	-2.322
at3g59960	Symbols: ASHH4, SDG24 | ASHH4 (HISTONE-LYSINE N-METHYLTRANSFERASE ASHH4); histone-lysine N-methyltransferase | chr3:22148334-22150386 FORWARD	-2.585		at3g48100	Symbols: ARR5, ATRR2, IBC6 | ARR5 (ARABIDOPSIS RESPONSE REGULATOR 5); transcription regulator/ two-component response regulator | chr3:17758427-17760874 REVERSE	2.492		at4g01250	Symbols: WRKY22, AtWRKY22 | WRKY22; transcription factor | chr4:522604-524216 REVERSE	-2.397
at2g03050	mitochondrial transcription termination factor-related / mTERF-related | chr2:899690-900946 REVERSE	-2.585		at3g46080	zinc finger (C2H2 type) family protein | chr3:16922753-16923247 REVERSE	2.476		at1g22190	AP2 domain-containing transcription factor, putative | chr1:7835782-7837288 FORWARD	-2.477
at5g20510	Symbols: AL5 | AL5 (ALFIN-LIKE 5); DNA binding / methylated histone residue binding | chr5:6939813-6942908 REVERSE	-2.406		at4g04840	Symbols: ATMSRB6 | methionine sulfoxide reductase domain-containing protein / SeIR domain-containing protein | chr4:2449560-2451589 FORWARD	2.474		at5g41315	Symbols: GL3, MYC6.2 | GL3 (GLABROUS 3); protein binding / transcription factor | chr5:16529455-16532879 FORWARD	-2.478
at1g27050	Symbols: ATHB54 | ATHB54 (ARABIDOPSIS THALIANA HOMEOBOX PROTEIN 54); nucleic acid binding / transcription factor | chr1:9391890-9394591 FORWARD	-2.17		at4g11070	Symbols: WRKY41, AtWRKY41 | WRKY41; transcription factor | chr4:6759303-6760794 FORWARD	2.459		at5g43840	Symbols: AT-HSFA6A, HSFA6A | AT-HSFA6A; DNA binding / transcription factor | chr5:17625437-17626364 REVERSE	-2.485
at1g28050	zinc finger (B-box type) family protein | chr1:9775528-9777810 REVERSE	-2		at5g17490	Symbols: RGL3 | RGL3 (RGA-LIKE PROTEIN 3); transcription factor | chr5:5764063-5766077 REVERSE	2.434		at5g07310	AP2 domain-containing transcription factor, putative | chr5:2305684-2306660 FORWARD	-2.585
at2g35640	hydroxyproline-rich glycoprotein family protein | chr2:14982835-14984182 FORWARD	-2		at1g13790	XH/XS domain-containing protein / XS zinc finger domain-containing protein | chr1:4727438-4730425 FORWARD	2.431		at1g49900	zinc finger (C2H2 type) family protein | chr1:18473908-18477643 REVERSE	-2.585
at2g22300	Symbols: CAMTA3, SR1 | SR1 (SIGNAL RESPONSIVE 1); calmodulin binding / transcription regulator | chr2:9471388-9476646 FORWARD	-2		at3g52450	Symbols: PUB22 | PUB22 (PLANT U-BOX 22); ubiquitin-protein ligase | chr3:19440739-19442383 REVERSE	2.43		at1g64380	AP2 domain-containing transcription factor, putative | chr1:23890646-23892173 REVERSE	-2.644
				at1g18710	Symbols: AtMYB47 | AtMYB47 (myb domain protein 47); DNA binding / transcription factor | chr1:6450594-6453114 FORWARD	2.408		at4g38000	Dof-type zinc finger domain-containing protein | chr4:17858351-17859325 FORWARD	-2.7
				at4g05100	Symbols: AtMYB74 | AtMYB74 (myb domain protein 74); DNA binding / transcription factor | chr4:2618454-2619887 FORWARD	2.38		at1g09950	transcription factor-related | chr1:3240606-3241632 REVERSE	-2.7
				at1g66370	Symbols: MYB113, AtMYB113 | MYB113 (myb domain protein 113); DNA binding / transcription factor | chr1:24753634-24754604 FORWARD	2.375		at3g52450	Symbols: PUB22 | PUB22 (PLANT U-BOX 22); ubiquitin-protein ligase | chr3:19440739-19442383 REVERSE	-2.766
				at5g67450	Symbols: AZF1 | AZF1 (ARABIDOPSIS ZINC-FINGER PROTEIN 1); DNA binding / nucleic acid binding / transcription factor/ transcription repressor/ zinc ion binding | chr5:26918793-26919949 REVERSE	2.352		at1g66170	Symbols: MMD1 | MMD1 (MALE MEIOCYTE DEATH 1); DNA binding / protein binding / zinc ion binding | chr1:24638685-24641494 REVERSE	-2.807
				at1g74930	Symbols: ORA47 | ORA47; DNA binding / transcription factor | chr1:28144132-28145049 FORWARD	2.34		at3g55980	Symbols: SZF1, ATSZF1 | SZF1 (SALT-INDUCIBLE ZINC FINGER 1); transcription factor | chr3:20776295-20778842 FORWARD	-2.896
				at5g54230	Symbols: MYB49, AtMYB49 | MYB49 (myb domain protein 49); transcription factor | chr5:22016250-22017933 REVERSE	2.322		at1g11490	zinc finger (C2H2 type) family protein | chr1:3868884-3870065 REVERSE	-3.087
				at3g19580	Symbols: AZF2 | AZF2 (ARABIDOPSIS ZINC-FINGER PROTEIN 2); DNA binding / nucleic acid binding / transcription factor/ transcription repressor/ zinc ion binding | chr3:6803166-6804233 REVERSE	2.289		at4g25480	Symbols: DREB1A, CBF3, ATCBF3 | DREB1A (DEHYDRATION RESPONSE ELEMENT B1A); DNA binding / transcription activator/ transcription factor | chr4:13018214-13019121 REVERSE	-3.19
				at3g57600	AP2 domain-containing transcription factor, putative | chr3:21332783-21333863 FORWARD	2.284		at1g77640	AP2 domain-containing transcription factor, putative | chr1:29178737-29179675 FORWARD	-3.617
				at5g57150	basic helix-loop-helix (bHLH) family protein | chr5:23152319-23155066 FORWARD	2.283		at1g66500	zinc finger (C2H2-type) family protein | chr1:24811149-24812650 REVERSE	-3.677
				at5g52600	Symbols: AtMYB82 | AtMYB82 (myb domain protein 82); DNA binding / transcription factor | chr5:21343102-21343968 REVERSE	2.273		at1g33760	AP2 domain-containing transcription factor, putative | chr1:12237878-12238598 FORWARD	-3.694
				at2g46510	Symbols: ATAIB | ATAIB (ABA-INDUCIBLE BHLH-TYPE TRANSCRIPTION FACTOR); DNA binding / transcription factor | chr2:19090953-19093315 REVERSE	2.272		at5g18000	transcriptional factor B3 family protein | chr5:5959900-5961642 REVERSE	-3.7
				at5g13080	Symbols: WRKY75, ATWRKY75 | WRKY75; transcription factor | chr5:4149740-4151150 REVERSE	2.253		at1g27730	Symbols: STZ, ZAT10 | STZ (salt tolerance zinc finger); nucleic acid binding / transcription factor/ transcription repressor/ zinc ion binding | chr1:9648141-9649073 REVERSE	-4.133
				at2g31180	Symbols: ATMYB14, MYB14AT, MYB14 | MYB14 (MYB DOMAIN PROTEIN 14); DNA binding / transcription factor | chr2:13286721-13288176 REVERSE	2.248		at4g25490	Symbols: CBF1, DREB1B, ATCBF1 | CBF1 (C-REPEAT/DRE BINDING FACTOR 1); DNA binding / transcription activator/ transcription factor | chr4:13021780-13022725 REVERSE	-5.044
				at5g46710	zinc-binding family protein | chr5:18952616-18954692 REVERSE	2.238		at1g19210	AP2 domain-containing transcription factor, putative | chr1:6626822-6627530 REVERSE	-5.275
				at3g46770	transcriptional factor B3 family protein | chr3:17223954-17225316 FORWARD	2.233		at4g25470	Symbols: CBF2, DREB1C, FTQ4, ATCBF2 | CBF2 (C-REPEAT/DRE BINDING FACTOR 2); DNA binding / transcription activator/ transcription factor | chr4:13015277-13016220 REVERSE	-5.752
				at3g19040	Symbols: TAF1, TAF1B, HAF2 | HAF2 (HISTONE ACETYLTRANSFERASE OF THE TAFII250 FAMILY 2); DNA binding / histone acetyltransferase/ transcription cofactor | chr3:6567157-6575282 REVERSE	2.222		at5g21960	AP2 domain-containing transcription factor, putative | chr5:7258363-7259308 REVERSE	-5.765
				at2g38470	Symbols: WRKY33, ATWRKY33 | WRKY33; transcription factor | chr2:16108361-16110766 FORWARD	2.22		at1g74930	Symbols: ORA47 | ORA47; DNA binding / transcription factor | chr1:28144132-28145049 FORWARD	-6.103
				at3g11020	Symbols: DREB2B, DREB2 | DREB2B (DRE/CRT-BINDING PROTEIN 2B); DNA binding / transcription activator/ transcription factor | chr3:3455355-3457214 FORWARD	2.204		at1g12610	Symbols: DDF1 | DDF1 (DWARF AND DELAYED FLOWERING 1); DNA binding / sequence-specific DNA binding / transcription factor | chr1:4289944-4291017 REVERSE	-7.644
				at5g61890	AP2 domain-containing transcription factor family protein | chr5:24852639-24853910 REVERSE	2.201
				at5g13330	Symbols: Rap2.6L | Rap2.6L (related to AP2 6L); DNA binding / transcription factor | chr5:4272060-4274660 FORWARD	2.19
				atcg00410	Symbols: TRNF | chloroplast TRNF | chrC:48175-48247 FORWARD	2.17
				at4g35590	RWP-RK domain-containing protein | chr4:16892909-16894865 FORWARD	2.17
				at5g59340	Symbols: WOX2 | WOX2 (WUSCHEL RELATED HOMEOBOX 2); transcription factor | chr5:23933404-23934690 REVERSE	2.158
				at5g60830	Symbols: AtbZIP70 | AtbZIP70 (Arabidopsis thaliana basic leucine-zipper 70); DNA binding / transcription factor | chr5:24472639-24473319 FORWARD	2.147
				at5g04760	myb family transcription factor | chr5:1373530-1374787 REVERSE	2.142
				at1g67370	Symbols: ASY1, ATASY1 | ASY1 (ASYNAPTIC 1); DNA binding | chr1:25239117-25243837 REVERSE	2.129
				at2g23320	Symbols: WRKY15 | WRKY15; calmodulin binding / transcription factor | chr2:9924933-9926372 FORWARD	2.116
				at2g31210	basic helix-loop-helix (bHLH) family protein | chr2:13296143-13298277 FORWARD	2.087
				at2g45820	DNA-binding protein, putative | chr2:18862953-18864691 REVERSE	2.085
				at5g05140	transcription elongation factor-related | chr5:1519913-1522667 FORWARD	2.072
				at1g78280	transferase, transferring glycosyl groups | chr1:29452555-29457373 FORWARD	2.069
				at2g46400	Symbols: WRKY46, ATWRKY46 | WRKY46; transcription factor | chr2:19043414-19044826 REVERSE	2.066
				at4g31805	WRKY family transcription factor | chr4:15385280-15386982 FORWARD	2.059
				at3g60670	zinc-binding protein, putative | chr3:22424512-22426288 REVERSE	2.037
				at3g01220	Symbols: ATHB20 | ATHB20 (ARABIDOPSIS THALIANA HOMEOBOX PROTEIN 20); DNA binding / transcription factor | chr3:73481-75538 FORWARD	2.036
				at1g04500	zinc finger CONSTANS-related | chr1:1221433-1224366 REVERSE	2.032
				at5g40340	PWWP domain-containing protein | chr5:16131654-16134916 REVERSE	2.03
				at1g22490	basic helix-loop-helix (bHLH) family protein | chr1:7938251-7940592 REVERSE	2.029
				at2g40350	DNA binding / transcription factor | chr2:16851595-16852068 REVERSE	2
				at1g04445	zinc finger (C2H2 type) family protein | chr1:1207344-1207862 FORWARD	2
				at1g22130	Symbols: AGL104 | AGL104 (AGAMOUS-LIKE 104); DNA binding / transcription factor | chr1:7812387-7814264 REVERSE	2
				at4g29030	glycine-rich protein | chr4:14307249-14307973 FORWARD	2
				at5g58280	transcriptional factor B3 family protein | chr5:23567338-23568670 FORWARD	2
				Accession n.	description CTRS	down-regulated
				at5g36240	zinc knuckle (CCHC-type) family protein | chr5:14277972-14278924 REVERSE	-4
				at5g41030	TCP family transcription factor, putative | chr5:16428706-16429437 FORWARD	-3.663
				at5g56200	zinc finger (C2H2 type) family protein | chr5:22747768-22749249 FORWARD	-3.585
				at4g33880	basic helix-loop-helix (bHLH) family protein | chr4:16239363-16241137 REVERSE	-3.222
				at2g33710	AP2 domain-containing transcription factor family protein | chr2:14258509-14260733 REVERSE	-3.17
				at1g29860	Symbols: WRKY71, ATWRKY71 | WRKY71; transcription factor | chr1:10454482-10455785 FORWARD	-3.17
				at5g56960	basic helix-loop-helix (bHLH) family protein | chr5:23038703-23041174 REVERSE	-3.087
				at3g48920	Symbols: AtMYB45 | AtMYB45 (myb domain protein 45); DNA binding / transcription factor | chr3:18139392-18140561 FORWARD	-3.087
				at2g47460	Symbols: MYB12, ATMYB12, PFG1 | MYB12 (MYB DOMAIN PROTEIN 12); DNA binding / transcription activator/ transcription factor | chr2:19476337-19479478 FORWARD	-3
				at1g66600	Symbols: WRKY63, ATWRKY63 | WRKY63; transcription factor | chr1:24848320-24849364 FORWARD	-2.907
				at1g77200	AP2 domain-containing transcription factor TINY, putative | chr1:29004357-29005091 REVERSE	-2.784
				at5g57520	Symbols: ZFP2, ATZFP2 | ZFP2 (ZINC FINGER PROTEIN 2); nucleic acid binding / transcription factor/ zinc ion binding | chr5:23295964-23296683 FORWARD	-2.737
				at5g19790	Symbols: RAP2.11 | RAP2.11 (related to AP2 11); DNA binding / transcription factor | chr5:6689108-6690040 REVERSE	-2.585
				at5g13910	Symbols: LEP | LEP (LEAFY PETIOLE); DNA binding / transcription factor | chr5:4482450-4483085 REVERSE	-2.585
				at1g71200	DNA binding / transcription factor | chr1:26835973-26837308 REVERSE	-2.585
				at5g42700	transcriptional factor B3 family protein | chr5:17122171-17124353 FORWARD	-2.585
				at1g34650	Symbols: HDG10 | HDG10 (HOMEODOMAIN GLABROUS 10); DNA binding / transcription factor | chr1:12692995-12697834 FORWARD	-2.585
				at5g49700	DNA-binding protein-related | chr5:20192599-20193429 FORWARD	-2.585
				at3g56980	Symbols: BHLH039, ORG3 | BHLH039; DNA binding / transcription factor | chr3:21086546-21087494 REVERSE	-2.485
				at1g67260	Symbols: TCP1 | TCP1; DNA binding / transcription factor | chr1:25168228-25169307 REVERSE	-2.229
				at3g07260	forkhead-associated domain-containing protein / FHA domain-containing protein | chr3:2309704-2310788 FORWARD	-2.222
				at1g18860	Symbols: WRKY61, ATWRKY61 | WRKY61; transcription factor | chr1:6509492-6511227 FORWARD	-2.152
				at2g18550	Symbols: HB-2, ATHB21 | HB-2 (HOMEOBOX-2); DNA binding / transcription factor | chr2:8049663-8051213 REVERSE	-2.115
				at3g47500	Symbols: CDF3 | CDF3 (CYCLING DOF FACTOR 3); DNA binding / protein binding / transcription factor | chr3:17504000-17506058 REVERSE	-2.062
				at1g01060	Symbols: LHY, LHY1 | LHY (LATE ELONGATED HYPOCOTYL); DNA binding / transcription factor | chr1:33666-37840 REVERSE	-2.061
				at5g67110	Symbols: ALC | ALC (ALCATRAZ); DNA binding / transcription factor | chr5:26785106-26786383 REVERSE	-2
				at3g51060	Symbols: STY1, SRS1 | STY1 (STYLISH 1); protein heterodimerization/ transcription factor | chr3:18964344-18966405 FORWARD	-2
				at3g10113	myb family transcription factor | chr3:3118043-3119391 REVERSE	-2

## Sheet: Phenylpropanoids
Accession n.	description - CTRS	Up-Regulation (Fold Change)		Accession n.	description - Phylgreen	Up-Regulation (Fold Change)		Accession n.	description - Delfan plus	Down-Regulation (Fold Change)
at1g62940	Symbols: ACOS5 | ACOS5 (ACYL-COA SYNTHETASE 5); 4-coumarate-CoA ligase/ long-chain-fatty-acid-CoA ligase/ medium-chain-fatty-acid-CoA ligase | chr1:23310535-23312747 FORWARD	3.459		at1g80820	Symbols: CCR2, ATCCR2 | CCR2 (CINNAMOYL COA REDUCTASE); cinnamoyl-CoA reductase	3.474		at5g66690	Symbols: UGT72E2 | UGT72E2; UDP-glycosyltransferase/ coniferyl-alcohol glucosyltransferase/ transferase, transferring glycosyl groups | chr5:26625080-26626793 FORWARD	4.858
at3g50290	transferase, transferring acyl groups other than amino-acyl groups | chr3:18640172-18640993 FORWARD	2.375		at1g77530	O-methyltransferase family 2 protein	3.138		at2g23910	cinnamoyl-CoA reductase-related | chr2:10177834-10180064 FORWARD	3.248
at5g23230	Symbols: NIC2 | NIC2 (NICOTINAMIDASE 2); catalytic/ nicotinamidase | chr5:7825882-7826611 REVERSE	2.263		at3g50280	transferase family protein	2.866		at1g77530	O-methyltransferase family 2 protein | chr1:29136037-29137555 FORWARD	2.632
at5g38130	transferase family protein | chr5:15217910-15219372 REVERSE	2.04		at5g14700	cinnamoyl-CoA reductase-related E	2.846				Down-Regulation (Fold Change)
Accession n.	description - CTRS	Down-Regulation (Fold Change)		at2g23910	cinnamoyl-CoA reductase-related	2.755		at4g35160	O-methyltransferase family 2 protein | chr4:16730760-16732811 REVERSE	-3.737
at1g67990	Symbols: ATTSM1, TSM1 | TSM1; N1,N5,N10-tris-(5-hydroxyferuloyl)spermidine O-methyltransferase/ caffeoyl CoA:S-adenosyl-L-methionine O-methyltransferase/ caffeoyl-CoA O-methyltransferase/ tricaffeoyl spermidine:S-adenosyl-L-methionine O-methyltransferase/ trihydroxyferuloyl sper | chr1:25489455-25490867 FORWARD	-2		at5g38120	4-coumarate--CoA ligase family protein / 4-coumaroyl-CoA synthase family protein	2.27
at5g01050	laccase family protein / diphenol oxidase family protein | chr5:18086-20812 REVERSE	-2.115
at1g28680	transferase family protein | chr1:10078189-10080029 FORWARD	-2.322
