# Supplementary material for: Priming Treatments with Biostimulants to Cope the Short-Term Heat Stress Response: A Transcriptomic Profile Evaluation
Source: Plants (Basel). 2022 Apr 21;11(9):1130. doi: 10.3390/plants11091130 (PMC9101846; doi:10.3390/plants11091130)
Supplement: Supplementary file 1 [file plants-11-01130-s001.zip › Supplementary Dataset S3.xlsx]

## Sheet: FACH
	CTRS
Category	Term	Count	%	PValue	Fold Enrichment	Bonferroni	Benjamini	FDR
INTERPRO	IPR003614:Knottin, scorpion toxin-like	7	9510869565217392	3.09527e+11	741778523489933	2234719972932856	2234719972932856	4.75378e+16
INTERPRO	IPR002472:Palmitoyl protein thioesterase	4	5434782608695652	6.26371e+11	2119367209971237	4006477580116059	2258215696698893	9598046220245736
GOTERM_MF_DIRECT	GO:0016790~thiolester hydrolase activity	4	5434782608695652	6.51885e+11	2089221040528888	2.2607e+16	2.2607e+16	9031089888815624
GOTERM_MF_DIRECT	GO:0008474~palmitoyl-(protein) hydrolase activity	5	6793478260869565	7.68731e+11	1.14254e+16	2608300077272724	1.4025e+16	1.06418e+16
SMART	SM00505:Knot1	6	8152173913043478	2.66065e+12	9942553610072790	3091198844386911	3091198844386911	3.04072e+16
GOTERM_BP_DIRECT	GO:0002084~protein depalmitoylation	4	5434782608695652	607707563543745	1.03231e+16	9817724273720674	9817724273720674	8711500170597319
UP_SEQ_FEATURE	active site:Proton acceptor	26	3532608695652174	6572826383236943	1.75512e+16	9801022054916876	9801022054916876	9268187231886538
GOTERM_CC_DIRECT	GO:0005829~cytosol	81	1.10054e+16	7046695694776024	1.32855e+16	7390983527636557	7390983527636557	8413915212364243
INTERPRO	IPR008176:Gamma thionin	4	5434782608695652	8365693143667061	9272231543624162	9989547723272352	8985145847429395	1.21299e+16
KEGG_PATHWAY	ath00062:Fatty acid elongation	6	8152173913043478	3.86819e+16	5561176470588236	3026299591831031	3026299591831031	4154153129433336
	Phylgreen
Category	Term	Count	%	PValue	Fold Enrichment	Bonferroni	Benjamini	FDR
GOTERM_BP_DIRECT	GO:0009611~response to wounding	44	3.55987	4.09626e-19	5.21713	2.66257e-16	2.66257e-16	6.11611e-16
GOTERM_BP_DIRECT	GO:0006952~defense response	83	6.71521	6.52523e-19	2.97635	4.2414e-16	2.1207e-16	9.7428e-16
GOTERM_BP_DIRECT	GO:0010200~response to chitin	30	2.42718	2.22753e-13	5.32233	1.44762e-10	4.8254e-11	3.32534e-10
GOTERM_BP_DIRECT	GO:0009753~response to jasmonic acid	32	2.589	4.70267e-13	4.84014	3.05689e-10	7.64222e-11	7.02194e-10
UP_SEQ_FEATURE	DNA-binding region:AP2/ERF	29	2.34628	1.19757e-12	5.1018	8.15564e-10	8.15564e-10	1.79939e-09
GOTERM_MF_DIRECT	GO:0003700~transcription factor activity, sequence-specific DNA binding	128	10.356	8.34041e-12	1.84447	3.55303e-09	3.55303e-09	1.17399e-08
INTERPRO	IPR001471:AP2/ERF domain	29	2.34628	1.50256e-11	4.70602	1.20655e-08	1.20655e-08	2.30756e-08
SMART	SM00380:AP2	29	2.34628	3.55737e-11	4.44963	4.51785e-09	4.51785e-09	4.1255e-08
INTERPRO	IPR016177:DNA-binding, integrase-type	29	2.34628	1.05896e-10	4.3486	8.50344e-08	4.25172e-08	1.6263e-07
GOTERM_MF_DIRECT	GO:0043565~sequence-specific DNA binding	62	5.01618	3.91075e-09	2.26129	1.66598e-06	8.32988e-07	5.5047e-06
GOTERM_BP_DIRECT	GO:0006355~regulation of transcription, DNA-templated	143	11.5696	1.31413e-08	1.59235	8.5418e-06	1.70837e-06	1.96212e-05
	Phylgreen wave
Category	Term	Count	%	PValue	Fold Enrichment	Bonferroni	Benjamini	FDR
UP_KEYWORDS	Plant defense	30	7228915662650602	1.62393e+11	2.46368e+16	3323550264627828	3323550264627828	2.04347e+16
GOTERM_BP_DIRECT	GO:0055114~oxidation-reduction process	43	1.03614e+16	2.29951e+11	199362656641604	9611565959188106	9611565959188106	3229652632481539
UP_KEYWORDS	Oxidoreductase	38	9156626506024096	3.47821e+10	2.09252e+16	7105101193968344	3.55888e+16	4376322338601746
GOTERM_BP_DIRECT	GO:0006952~defense response	26	6265060240963856	7.15481e+09	2.43655e+16	2.96042e+16	1.49133e+16	1.00457e+16
GOTERM_CC_DIRECT	GO:0005576~extracellular region	66	1.59036e+16	8.90534e+09	1.62181e+16	9483881584818056	9483881584818056	1.00056e+16
UP_KEYWORDS	Iron	27	6506024096385541	1.0585e+11	2.34501e+16	2.14665e+16	7207335684942473	1.33126e+16
GOTERM_MF_DIRECT	GO:0005506~iron ion binding	16	3.85542e+16	4.94945e+11	2874703369719981	1.48199e+16	1.48199e+16	6670845012192061
SMART	SM00353:HLH	9	2.16867e+16	8.71351e+11	4451902748414375	6817497373282821	6817497373282821	9247301504768268
GOTERM_BP_DIRECT	GO:0009617~response to bacterium	8	1.92771e+16	1339861114858732	4836339869281046	4.3057e+16	1.71142e+16	1.86575e+16
UP_SEQ_FEATURE	domain:Helix-loop-helix motif	9	2.16867e+16	1.39289e+16	4145640074211503	3651704633710904	3651704633710904	1.86854e+16

## Sheet: FAC
CTRS
Annotation Cluster 1	Enrichment Score: 2.163521832638462
Category	Term	%	PValue	Fold Enrichment	Bonferroni	Benjamini	FDR
INTERPRO	IPR002472:Palmitoyl protein thioesterase	0.5434782608695652	6.263714385641222E-4	21.19367209971237	0.4006477580116059	0.2258215696698893	0.9598046220245737
GOTERM_MF_DIRECT	GO:0016790~thiolester hydrolase activity	0.5434782608695652	6.518845024975169E-4	20.89221040528888	0.22607023246857216	0.22607023246857216	0.9031089888815624
GOTERM_MF_DIRECT	GO:0008474~palmitoyl-(protein) hydrolase activity	0.6793478260869565	7.687307219657854E-4	11.425427565392354	0.2608300077272724	0.14025004084168313	1.0641833818234137
KEGG_PATHWAY	ath00062:Fatty acid elongation	0.8152173913043478	0.0038681885005588026	5.561176470588236	0.3026299591831031	0.3026299591831031	4.154153129433336
GOTERM_BP_DIRECT	GO:0002084~protein depalmitoylation	0.5434782608695652	0.00607707563543745	10.323102678571429	0.9817724273720674	0.9817724273720674	8.711500170597319
KEGG_PATHWAY	ath01212:Fatty acid metabolism	0.6793478260869565	0.1781497032477536	2.250952380952381	0.999999988095186	0.9262163095235577	88.32667394497714
GOTERM_CC_DIRECT	GO:0043231~intracellular membrane-bounded organelle	0.8152173913043478	0.5452340331546612	1.221677030703459	1.0	0.9942730803269656	99.99441823355991
Annotation Cluster 2	Enrichment Score: 1.4918617073946059
Category	Term	%	PValue	Fold Enrichment	Bonferroni	Benjamini	FDR
SMART	SM00505:Knot1	0.8152173913043478	2.6606497145798057E-4	9.942553610072792	0.03091198844386911	0.03091198844386911	0.30407221841047827
INTERPRO	IPR003614:Knottin, scorpion toxin-like	0.9510869565217392	3.095268410468762E-4	7.41778523489933	0.2234719972932856	0.2234719972932856	0.47537750856780914
INTERPRO	IPR008176:Gamma thionin	0.5434782608695652	0.008365693143667061	9.272231543624162	0.9989547723272353	0.8985145847429395	12.129852199392522
UP_KEYWORDS	Pyrrolidone carboxylic acid	0.6793478260869565	0.012823002806672134	5.447865353037766	0.9655569136950474	0.8144115135442055	15.531856067161042
GOTERM_BP_DIRECT	GO:0050832~defense response to fungus	1.9021739130434785	0.5286908285603248	1.090155239762931	1.0	0.9997353331756892	99.99869662109847
UP_KEYWORDS	Antimicrobial	1.0869565217391304	0.6019564212181583	1.0895730706075533	1.0	0.96118992409369	99.9994145084587
UP_KEYWORDS	Fungicide	1.0869565217391304	0.6019564212181583	1.0895730706075533	1.0	0.96118992409369	99.9994145084587
GOTERM_BP_DIRECT	GO:0031640~killing of cells of other organism	1.0869565217391304	0.6864308226253654	1.0036349826388888	1.0	0.9999746462635964	99.9999970564616
Phylgreen
Annotation Cluster 1	Enrichment Score: 8.58431741560398
Category	Term	%	PValue	Fold Enrichment	Bonferroni	Benjamini	FDR
UP_SEQ_FEATURE	DNA-binding region:AP2/ERF	2.3462783171521036	1.1975730032661627E-12	5.101799000118096	8.155639497076095E-10	8.155639497076095E-10	1.7993939671612225E-9
INTERPRO	IPR001471:AP2/ERF domain	2.3462783171521036	1.502555669451725E-11	4.706022698909102	1.2065505594627268E-8	1.2065505594627268E-8	2.307559698877526E-8
SMART	SM00380:AP2	2.3462783171521036	3.557368387427593E-11	4.449632031477703	4.517854201857574E-9	4.517854201857574E-9	4.1254977212190624E-8
INTERPRO	IPR016177:DNA-binding, integrase-type	2.3462783171521036	1.0589585621249365E-10	4.3486032534223344	8.503436199625014E-8	4.251718188630349E-8	1.6263044244624325E-7
UP_KEYWORDS	Ethylene signaling pathway	1.9417475728155338	8.268556200712045E-7	3.3426808278409808	2.0090581447218536E-4	5.0230238106574454E-5	0.0010693589179266993
GOTERM_BP_DIRECT	GO:0009873~ethylene-activated signaling pathway	1.9417475728155338	2.0924517763102227E-6	3.163664348420933	0.001359170567435175	1.360002588819409E-4	0.003124188770953218
UP_KEYWORDS	Activator	3.4789644012944985	6.9271178149556825E-6	2.1288415193726733	0.0016818795120197017	3.3660242853161826E-4	0.00895840268165804
Annotation Cluster 2	Enrichment Score: 6.257993456506758
Category	Term	%	PValue	Fold Enrichment	Bonferroni	Benjamini	FDR
GOTERM_MF_DIRECT	GO:0003700~transcription factor activity, sequence-specific DNA binding	10.355987055016183	8.340408212608249E-12	1.844468746010133	3.553027205782655E-9	3.553027205782655E-9	1.1739864635984532E-8
GOTERM_MF_DIRECT	GO:0043565~sequence-specific DNA binding	5.016181229773463	3.910745186388871E-9	2.261290374378779	1.6659760588844108E-6	8.329883763869006E-7	5.504700950620389E-6
GOTERM_BP_DIRECT	GO:0006355~regulation of transcription, DNA-templated	11.56957928802589	1.3141287484923104E-8	1.5923453737323148	8.541800451400405E-6	1.708365927277633E-6	1.9621220403998052E-5
GOTERM_BP_DIRECT	GO:0006351~transcription, DNA-templated	10.517799352750808	2.140471088668545E-8	1.6264242971844092	1.3912965442952618E-5	2.3188410163133E-6	3.195931340682634E-5
UP_KEYWORDS	Transcription regulation	10.679611650485436	1.2116438549173164E-7	1.5878603516226926	2.9442514026922773E-5	1.472136537272739E-5	1.5670058786110275E-4
UP_KEYWORDS	Transcription	10.679611650485436	4.48795218057953E-7	1.5507457295827314	1.0905131594340922E-4	3.635176008220942E-5	5.804208615067807E-4
UP_KEYWORDS	DNA-binding	8.89967637540453	8.420092126553298E-5	1.4483046677196352	0.0202537655870203	0.0025544425107481006	0.10884152791875712
GOTERM_MF_DIRECT	GO:0003677~DNA binding	8.89967637540453	0.001620371440538572	1.3249094050995631	0.49884412177350945	0.10875835521911348	2.256802736641683
UP_KEYWORDS	Nucleus	13.187702265372167	0.0700019525996953	1.1222733998377168	0.9999999780651372	0.42368427935785113	60.88158056710585
Phylgreen wave
Annotation Cluster 1	Enrichment Score: 3.123047609502288
Category	Term	%	PValue	Fold Enrichment	Bonferroni	Benjamini	FDR
GOTERM_BP_DIRECT	GO:0055114~oxidation-reduction process	10.361445783132531	2.2995105105306687E-5	1.99362656641604	0.009611565959188106	0.009611565959188106	0.03229652632481539
UP_KEYWORDS	Oxidoreductase	9.156626506024097	3.478213961037061E-5	2.0925228215767633	0.007105101193968344	0.0035588834225920296	0.04376322338601746
UP_KEYWORDS	Iron	6.506024096385541	1.058495293083442E-4	2.3450065445026183	0.021466544381809505	0.007207335684942473	0.13312609118668606
GOTERM_MF_DIRECT	GO:0020037~heme binding	3.3734939759036147	0.012227766511897591	2.189540908543198	0.9814301799231848	0.5494307603000586	15.323790394520763
UP_KEYWORDS	Metal-binding	11.80722891566265	0.2342794474684573	1.1336802649930264	1.0	0.7116811696193364	96.52409822580543
Annotation Cluster 2	Enrichment Score: 2.6289862734202494
Category	Term	%	PValue	Fold Enrichment	Bonferroni	Benjamini	FDR
SMART	SM00353:HLH	2.1686746987951806	8.713512883348241E-4	4.451902748414375	0.06817497373282821	0.06817497373282821	0.9247301504768268
UP_SEQ_FEATURE	domain:Helix-loop-helix motif	2.1686746987951806	0.0013928902609146568	4.145640074211503	0.3651704633710904	0.3651704633710904	1.8685350324975314
GOTERM_MF_DIRECT	GO:0046983~protein dimerization activity	3.3734939759036147	0.0030400650024110343	2.600500894454383	0.627113541073751	0.28023254749896354	4.0327836322947
UP_SEQ_FEATURE	DNA-binding region:Basic motif	2.1686746987951806	0.0035860170472643295	3.5637958532695375	0.6899875073689413	0.4432123451161487	4.745146841064541
INTERPRO	IPR011598:Myc-type, basic helix-loop-helix (bHLH) domain	2.1686746987951806	0.005413314183939067	3.375954522314611	0.9382446014507021	0.6047320121213258	7.5449674090580565
